# Supplementary material
Source: PubMed Central journal article supplement (PMC3666683)
Supplement: 1300126110_pnas.201300126SI.pdf [file 1300126110_pnas.201300126SI.pdf]

# Supporting Information

Wang et al. 10.1073/pnas.1300126110

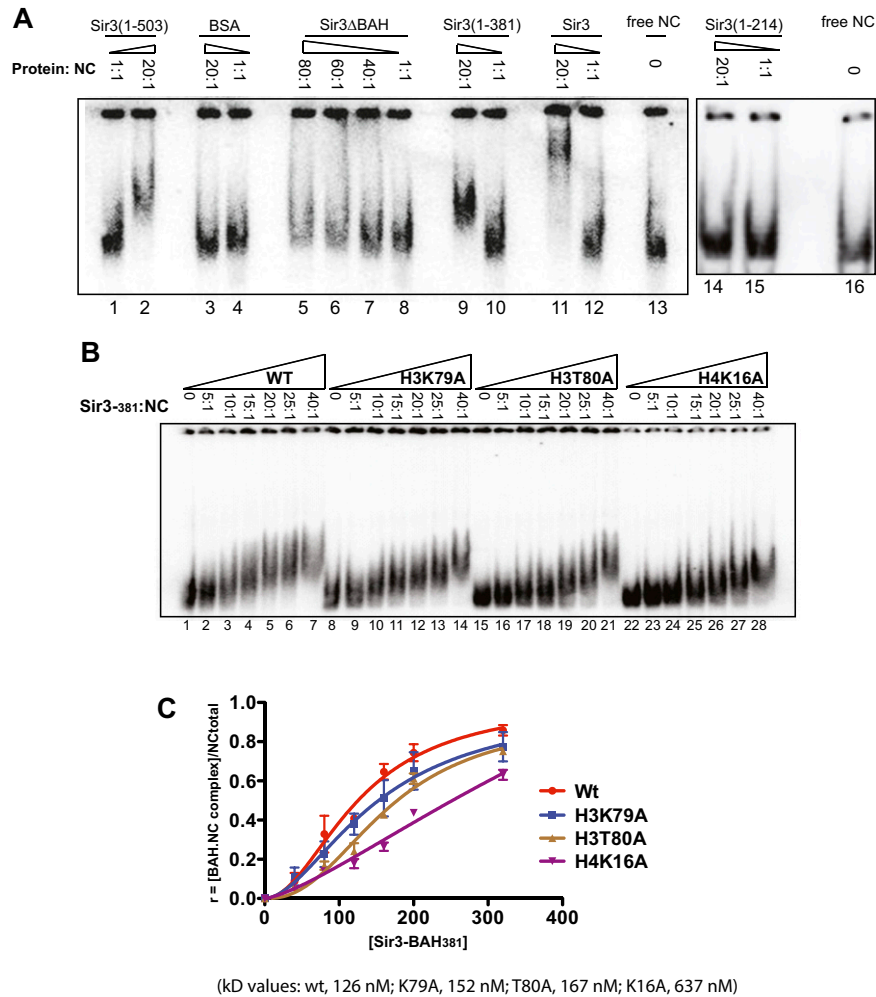

**Fig. S1.** Nucleosome binding properties of silent information regulator 3 (Sir3)-381 and other Sir3 fragments. (A) Gel-shift assays examining the association of full-length Sir3 and the indicated Sir3 subfragments with yeast mononucleosomes (NC). Mononucleosomes were reconstituted using bacterially expressed yeast histones and a  $^{32}\text{P}$ -labeled 601 DNA fragment (1). Sir3 protein was purified from yeast as described previously (1). (B) Gel-shift assays testing the association of Sir3-381 protein with nucleosomes containing WT, H3K79A, H3T80A, or H4K16A histones. (C) Band intensities were quantified by analysis of phosphorimager data with Quantity 1 software to generate binding curves for three independent experiments and calculate binding constant ( $K_D$ ) values. Data were fit with the binding equation  $y = A * \frac{[P]^h}{[P]^h + K^h} + B$ , where  $h$  is the Hill coefficient,  $[P]$  is the protein concentration,  $K$  is the  $K_D$ , and  $A$  and  $B$  are scaling parameters (2).

1. Johnson A, et al. (2009) Reconstitution of heterochromatin-dependent transcriptional gene silencing. *Mol Cell* 35(6):769–781.
2. Tanner NA, et al. (2008) Single-molecule studies of fork dynamics in *Escherichia coli* DNA replication. *Nat Struct Mol Biol* 15(2):170–176.





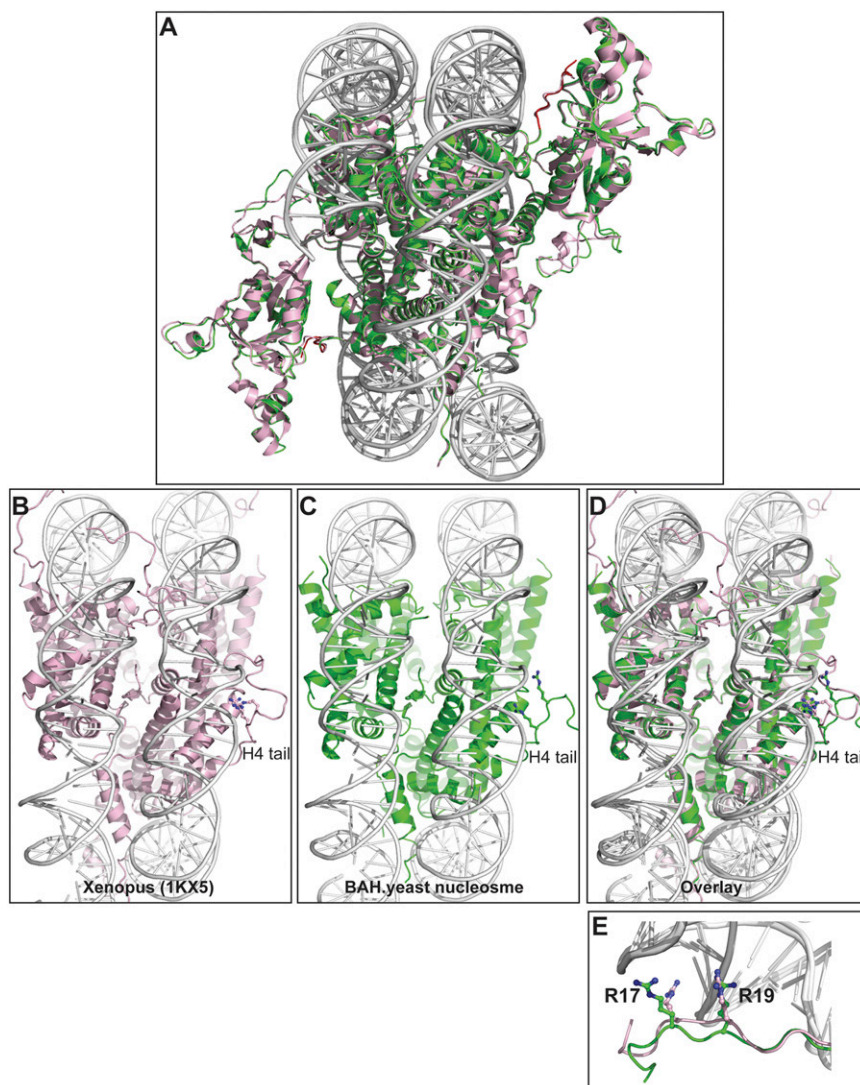

**Fig. S4.** Overlays of the Sir3-BAH-yeast nucleosome with other nucleosome structures. (A) Overlays of the Sir3-BAH-yeast nucleosome (green, this study) and Sir3-BAH-*Xenopus* nucleosome (pink) complexes (1). (B) Free *Xenopus* nucleosome crystal structure (1KX5) (2). (C) Structure of Sir3-BAH-yeast nucleosome with the BAH atoms removed. (D and E) Overlays of the structures in B and C showing that one of the two histone H4 chains in the free *Xenopus* nucleosome structure adopts a conformation similar to that observed in the Sir3-BAH-yeast nucleosome structure. However, in the free *Xenopus* nucleosome structure, H4R17 points into the minor groove and is not within DNA-bonding distance (zoom-in view in E).

1. Armache KJ, Garlick JD, Canzio D, Narlikar GJ, Kingston RE (2011) Structural basis of silencing: Sir3 BAH domain in complex with a nucleosome at 3.0 Å resolution. *Science* 334(6058): 977–982.
2. Davey CA, Sargent DF, Luger K, Maeder AW, Richmond TJ (2002) Solvent-mediated interactions in the structure of the nucleosome core particle at 1.9 Å resolution. *J Mol Biol* 319(5): 1097–1113.

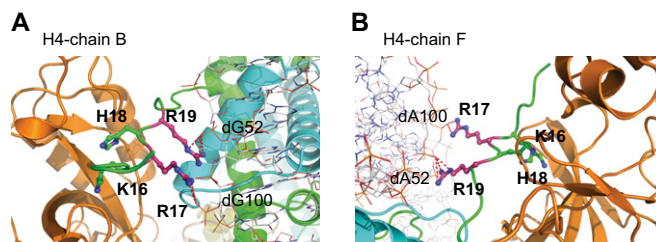

**Fig. S5.** Interaction of H4 with nucleosomal DNA in the Sir3-BAH-yeast nucleosome complex. H4R17 and R19 in both H4 chain B (A) and chain F (B) can engage in similar interactions with the phosphates of nucleotides 52 and 100 across minor grooves on opposite DNA strands on the two sides of the nucleosome.

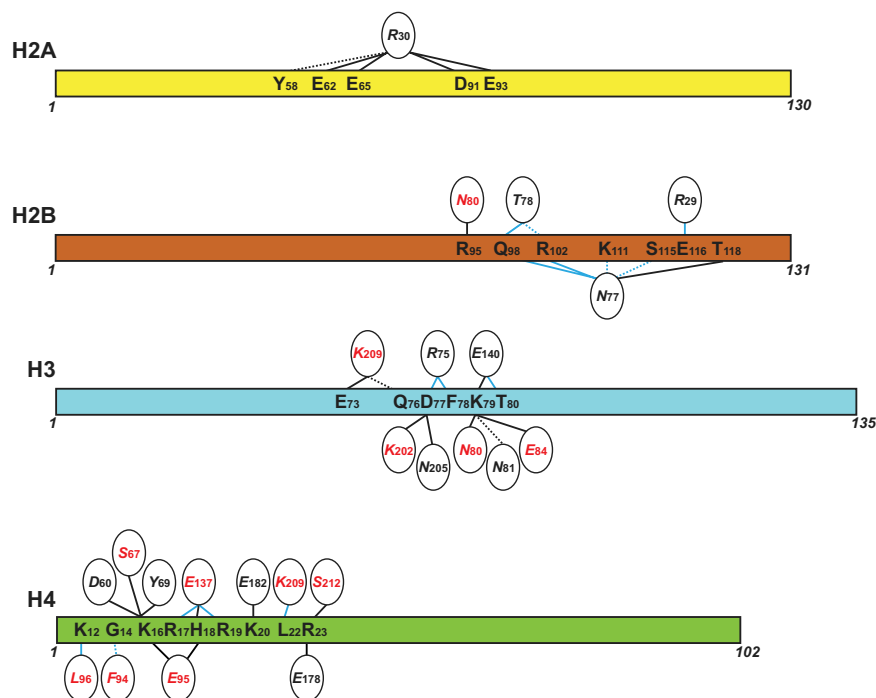

**Fig. S6.** Summary of the main interaction sites between Sir3-BAH382 and each of the four histones mapped onto the primary structure of the histones. Solid lines denote strong interactions (bond distances  $<4 \text{ \AA}$ ), and dotted lines denote weaker interactions (bond distances 4–5  $\text{\AA}$ ). Blue lines denote interactions between side chains in Sir3-BAH with the carbonyl atoms of the indicated amino acids in histones. The residues identified in previous mutagenesis studies with critical roles in silencing or Sir3 binding are shown in red.

**Table S1.** *Saccharomyces cerevisiae* strains used in this study

| Name    | Genotype                                                                                                                                                                                   | Reference  |
|---------|--------------------------------------------------------------------------------------------------------------------------------------------------------------------------------------------|------------|
| SF1     | JRY2334, Mata ade2-1 can1-100 his3-11 leu2-3.112 trp1 ura3-1 GAL                                                                                                                           | J. Rine    |
| DMY2376 | SF1 pep4 $\Delta$ ::LEU2                                                                                                                                                                   | (1)        |
| DMY3628 | DMY2376 SIR3-TAP-K.I-TRP1                                                                                                                                                                  | (1)        |
| DMY3810 | DMY2376 SIR3BAH-TAP-K.I-TRP1                                                                                                                                                               | This study |
| DMY3863 | DMY2376 SIR3 $\Delta$ BAH-TAP-K.I-TRP1                                                                                                                                                     | (2)        |
| WZY42   | Mat a ura3-52 lys2-801 ade2-1-1 trp1 $\Delta$ 63 his3 $\Delta$ 200 leu2 $\Delta$ 1 hht1-hhf1::pWZ405-F2F9-LEU2, hht2-hhf2::pWZ403-F4F10-HIS3 Ycp50-copyII (HHT2-HHF2)                      | (3)        |
| DMY3903 | WZY42 Sir3-TAP-KAN                                                                                                                                                                         | (2)        |
| DMY3985 | WZY42 Sir3BAH-TAP-KAN                                                                                                                                                                      | (2)        |
| SF10    | BJ5459, Mat a ura3-52 trp1 lys2-801 leu2 $\Delta$ 1 his3 $\Delta$ 200 pep4 $\Delta$ HIS prb1 $\Delta$ 1.6R can1 GAL                                                                        | E. Jones   |
| ADR2973 | JRY2334, Mat a ade2-1 can1-100 his3-11 leu2-3.112 trp1 ura3-1 GAL                                                                                                                          | (1)        |
| JDY135  | Mat a His3 $\Delta$ 200 leu2 $\Delta$ 1 lys2 $\Delta$ 0 met15 $\Delta$ 0 trp1 $\Delta$ 63 ura3-167 ade2::HISG hht1-hhf1::NAT hht2-hhf2-HYG RDN1::TY1-MET15 TELV::ADE2 (HHT1-HHF1) CEN-URA3 | (4)        |

- Rudner AD, Hall BE, Ellenberger T, Moazed D (2005) A nonhistone protein-protein interaction required for assembly of the SIR complex and silent chromatin. *Mol Cell Biol* 25(11): 4514–4528.
- Onishi M, Liou GG, Buchberger JR, Walz T, Moazed D (2007) Role of the conserved Sir3-BAH domain in nucleosome binding and silent chromatin assembly. *Mol Cell* 28(6):1015–1028.
- Zhang W, Bone JR, Edmondson DG, Turner BM, Roth SY (1998) Essential and redundant functions of histone acetylation revealed by mutation of target lysines and loss of the Gcn5p acetyltransferase. *EMBO J* 17(11):3155–3167.
- Dai J, et al. (2008) Probing nucleosome function: A highly versatile library of synthetic histone H3 and H4mutants. *Cell* 134(6):1066–1078.

**Table S2. Plasmids used in this study**

| Description            | Plasmid                                                 | Source     |
|------------------------|---------------------------------------------------------|------------|
| pRS414 CEN TRP1 H3K56A | Boeke-EMH-H3-56 K56A                                    | (1)        |
| pRS414 CEN TRP1 H4K16Q | pWZ414-F25 (pDM 688)                                    | (2)        |
| pRS414 CEN TRP1 H4K16A | Boeke-EMH-H4-16 K16A                                    | (1)        |
| pRS414 CEN TRP1 H4R17A | Boeke-EMH-H4-17 R17A                                    | (1)        |
| pRS414 CEN TRP1 H4H18A | Boeke-EMH-H4-18 H18A                                    | (1)        |
| pRS414 CEN TRP1 H4R19A | Boeke-EMH-H4-19 R19A                                    | (1)        |
| pRS414 CEN TRP1 H4K20A | Boeke-EMH-H4-20 K20A                                    | (1)        |
| pDM1009                | Sir3-3XFLAG, Gal 1–10, 2u (pRS425)                      | (3)        |
| pDM1082                | pRET3a-H3K79A (SC histone mutant)                       | (4)        |
| pDM1084                | pRET3a-H4K16A (SC histone mutant)                       | (4)        |
| pDM1230                | pRET3a-H3T80A (SC histone mutant)                       | This study |
| pDM1091                | 601 nucleosome-positioning sequence (Amp <sup>R</sup> ) | (5)        |

- Dai J, et al. (2008) Probing nucleosome function: A highly versatile library of synthetic histone H3 and H4 mutants. *Cell* 134(6):1066–1078.
- Zhang W, Bone JR, Edmondson DG, Turner BM, Roth SY (1998) Essential and redundant functions of histone acetylation revealed by mutation of target lysines and loss of the Gcn5p acetyltransferase. *EMBO J* 17(11):3155–3167.
- Buchberger JR, et al. (2008) Sir3–nucleosome interactions in spreading of silent chromatin in *Saccharomyces cerevisiae*. *Mol Cell Biol* 28(22):6903–6918.
- Johnson A, et al. (2009) Reconstitution of heterochromatin-dependent transcriptional gene silencing. *Mol Cell* 35(6):769–781.
- Li G, Widom J (2004) Nucleosomes facilitate their own invasion. *Nat Struct Mol Biol* 11(8):763–769.

**Table S3. Crystallographic data collection and refinement statistics for Sir3-382–ScNCP**

|                                               |                           |
|-----------------------------------------------|---------------------------|
| Data collection                               |                           |
| Space group                                   | $P6_1$                    |
| Cell dimensions                               |                           |
| A, b, c, Å                                    | 103.682, 103.682, 556.378 |
| $\alpha, \beta, \gamma, ^\circ$               | 90, 90, 120               |
| Wavelength, Å                                 | 0.97920                   |
| Resolution, Å                                 | 139.09–3.09               |
| $R_{\text{merge}}$ (high-resolution shell), % | 3.9 (48.7)                |
| $I/\sigma$ (high-resolution cell)             | 14.0 (1.5)                |
| Completeness (high-resolution shell), %       | 97.4 (97.9)               |
| Redundancy (high-resolution shell)            | 2.9 (2.9)                 |
| Refinement                                    |                           |
| Resolution, Å                                 | 85.45–3.09                |
| No. of reflections                            | 59,664                    |
| $R_{\text{work}}/R_{\text{free}}$ , %         | 23.13/25.48               |
| B-factors, Å <sup>2</sup>                     |                           |
| Overall                                       | 78.24                     |
| Protein                                       | 52.14                     |
| DNA                                           | 118.55                    |
| rms deviations                                |                           |
| Bond lengths, Å                               | 0.002                     |
| Bond angles, °                                | 0.611                     |
| Ramachandran plot*                            |                           |
| Most favored and additional allowed, %        | 99.9                      |
| Generously allowed, %                         | 0.1                       |
| Disallowed, %                                 | 0                         |

\*Calculated in the ADIT Validation Server (<http://deposit.rcsb.org/adit/>).
